# Supplementary material for: Postharvest Treatment with Methyl Jasmonate Impacts Lipid Metabolism in Tomatoes (<em>Solanum lycopersicum</em> L. cv. Grape) at Different Ripening Stages
Source: Preprints.org preprint supplement (doi:10.20944/preprints202103.0596.v1), 2021-03-24
Supplement: Supplementary file 1 [file Table S1.docx]

**Table S1.** Carotenoids contents (µg.g-1 FW) in tomato (*Solanum lycopersicum* L. cv. Grape) fruits exposed to 1-methylcyclopropene (MCP) and both 1-methylcyclopropene and methyl jasmonate (MCP+ MeJA) treatments at 04, 10 and 21 days after harvest (DAH) detected by high performance liquid chromatography (HPLC).

| Metabolite | **04 DAH** | | | **10 DAH** | | | **21 DAH** | | |
| --- | --- | --- | --- | --- | --- | --- | --- | --- | --- |
| ***CTRL*** | ***MCP*** | ***MCP+MeJA*** | ***CTRL*** | ***MCP*** | ***MeJA+MCP*** | ***CTRL*** | ***MCP*** | ***MCP+MeJA*** |
| Lycopene | 15.4±0.43g | 0.52±0.01h | 0.63±0.01h | 487.1±4.10c | 61.1±0.59f | 81.9±0.19e | 653.6±0.82b | 234.8±0.66d | 712.5±0.35a |
| β-carotene | 3.87±0.02d | 2.57±0.02g | 2.72±0.01f | 5.32±0.10c | 2.68±0.07fg | 2.97±0.02e | 7.23±0.01b | 3.02±0.01c | 8.02±0.01a |
| Lutein | 2.43±0.02g | 2.07±0.01i | 2.31±0.01h | 3.27±0.06c | 2.56±0.04f | 2.88±0.03d | 3.93±0.05b | 2.75±0.04e | 4.67±0.03a |
| Total | 21.7±0.42g | 5.17±0.01h | 5.66±0.03h | 495.6±4.10c | 66.3±0.63f | 87.8±0.22e | 664.7±0.85b | 240.8±0.68d | 725.1±0.35a |

CTRL: Control fruits. Different superscript letters indicate statistical significance (P < 0.05) at the same line (mean ± standard deviation. n = 4).
