# Supplementary material for: Postharvest Treatment with Methyl Jasmonate Impacts Lipid Metabolism in Tomatoes (<em>Solanum lycopersicum</em> L. cv. Grape) at Different Ripening Stages
Source: Preprints.org preprint supplement (doi:10.20944/preprints202103.0596.v1), 2021-03-24
Supplement: Supplementary file 2 [file Table S2.docx]

**Table S2.** Tocopherols, phytol and phytosterols in tomato (*Solanum lycopersicum* L. cv. Grape) fruits exposed to 1-methylcyclopropene (MCP) and both 1-methylcyclopropene and methyl jasmonate (MCP+ MeJA) treatments at 04, 10 and 21 days after harvest (DAH) detected by gas chromatography-mass spectrometry (GC-MS).

| Metabolite | **04 DAH** | | | **10 DAH** | | | **21 DAH** | | |
| --- | --- | --- | --- | --- | --- | --- | --- | --- | --- |
| ***CTRL*** | ***MCP*** | ***MCP+MeJA*** | ***CTRL*** | ***MCP*** | ***MCP+MeJA*** | ***CTRL*** | ***MCP*** | ***MCP+MeJA*** |
| **A) Tocopherols** | | | | | | | | | |
| α-tocopherol | 152,7±14,5d | 32,1±1,41e | 37,1±6,01e | 531,9±12,1a | 42,7±4,84e | 193,4±9,80c | 375,8±1,57b | 137,2±1,41d | 535,8±40,2a |
| β-tocopherol | 14,1±0,27d | 0,98±0,13g | 1,15±0,18g | 62,3±2,15a | 2,66±0,12g | 6,85±0,10e | 31,6±0,23c | 4,70±0,02f | 44,8±0,03b |
| γ-tocopherol | 11,6±0,49d | 1,91±0,15g | 2,03±0,05g | 14,6±0,38c | 2,71±0,09g | 8,71±0,16e | 18,9±0,72b | 3,71±0,12f | 22,7±0,79a |
| Total | 178,4±15,1cd | 34,9±0,86e | 40,3±0,99e | 608,9±14,6a | 48,11±4,77e | 208,9±6,07c | 426,4±1,45b | 145,6±1,67e | 603,2±39,8a |
| **B) Acyclic diterpenoids** | | | | | | | | | |
| Phytol | 21,3±2,25a | 10,9±0,21b | 19,5±1,05a | 9,54±0,18bc | 9,80±0,59b | 19,9±0,18a | 6,75±0,04d | 7,19±0,14d | 7,52±0,16cd |
| **C) Phytosterols** | | | | | | | | | |
| β-sitosterol | 113,2±7,14f | 21,9±0,61h | 29,7±0,89h | 410,2±10,9b | 79,5±4,59g | 151,9±2,45e | 282,7±1,32d | 171,1±16,5c | 487,6±15,3a |
| Estigmasterol | 227,3±10,5f | 50,9±1,04d | 60,5±1,38e | 344,1±8,75e | 49,6±1,76b | 68,9±0,19a | 400,8±1,71d | 164,5±4,68c | 535,6±10,6ab |
| Estigmastadienol | 18,2±0,26d | 2,10±0,13h | 6,47±0,21f | 27,8±0,68c | 5,62±0,11g | 7,31±10,18e | 34,2±0,16b | 7,03±0,13ef | 44,9±0,21a |
| Total | 358,7±14,3e | 74,9±1,63h | 96,7±2,14h | 782,0±20,2b | 134,8±6,05g | 228,2±2,39f | 717,6±2,80c | 542,7±19,9d | 1068,0±25,3a |

Values were presented as normalized area by n-tridecane (internal non-polar standard). CTRL: Control fruits. Different superscript letters indicate statistical significance (P < 0.05) at the same line (mean ± standard deviation, n = 4).
